# Supplementary material
Source: PubMed Central journal article supplement (PMC9329250)
Supplement: NIHMS1802035-supplement-Supp1.pdf [file NIHMS1802035-supplement-Supp1.pdf]

# Supplement

## International IPF Genetics Consortium

### Writing Group

Richard J Allen, Carlos Flores, Beatriz Guillen-Guio, R Gisli Jenkins, Toby M Maher, Imre Noth, Justin M Oldham, David A Schwartz, Amy Stockwell, Louise V Wain, Brian L Yaspan

### UK Study

Richard J Allen, Helen L Booth, William A Fahy, Ian P Hall, Simon P Hart, Mike R Hill, Nik Hirani, Richard B Hubbard, R Gisli Jenkins, Toby M Maher, Robin J McNulty, Ann B Millar, Philip L Molyneaux, Vidya Navaratnam, Eunice Oballa, Helen Parfrey, Gauri Saini, Ian Sayers, Martin D Tobin, Louise V Wain, Moira K B Whyte

### Chicago Study

Ayodeji Adegunsoye, Carlos Flores, Naftali Kaminski, Shwu-Fan Ma, Imre Noth, Justin M Oldham, Mary E Streck, Yingze Zhang

### Colorado Study

Tasha E Fingerlin, David A Schwartz

### UUS Study

Richard J Allen, Carlos Flores, Beatriz Guillen-Guio, R Gisli Jenkins, Shwu-Fan Ma, Toby M Maher, Maria Molina-Molina, Philip L Molyneaux, Imre Noth, Justin M Oldham, Louise V Wain

### Genentech study

Margaret Neighbors, Xuting Sheng, Amy Stockwell, Brian L Yaspan

### Supplementary Table 1: All sentinel variants associated with IPF risk

This table includes the most associated variant (sentinel) for the 19 signals (14 previously reported loci and the five novel loci identified here) associated with IPF risk. The risk allele is the allele associated with increased risk of IPF. Position is for genetic build 37. Chr=chromosome. EAF=Effect allele frequency. OR=Odds ratio. CI=Confidence interval. PPR=posterior probability of replicability calculated using MAMBA.

| Chr | Position  | rsid        | Implicated gene | Non-effect allele | Risk allele | EAF   | OR [95% CI]       | p                       | PPR    |
|-----|-----------|-------------|-----------------|-------------------|-------------|-------|-------------------|-------------------------|--------|
| 3   | 44903434  | rs2292181   | <i>KIF15</i>    | G                 | C           | 5.2%  | 1.52 [1.36, 1.70] | 3.95×10 <sup>-13</sup>  | 100.0% |
| 3   | 169486271 | rs9860874   | <i>TERC</i>     | C                 | A           | 27.6% | 1.29 [1.22, 1.37] | 6.49×10 <sup>-18</sup>  | 98.8%  |
| 4   | 89837808  | rs2609259   | <i>FAM13A</i>   | C                 | A           | 22.4% | 1.30 [1.22, 1.39] | 6.47×10 <sup>-17</sup>  | 98.6%  |
| 5   | 1282414   | rs7725218   | <i>TERT</i>     | A                 | G           | 67.1% | 1.41 [1.33, 1.50] | 4.90×10 <sup>-32</sup>  | 100.0% |
| 6   | 7563232   | rs2076295   | <i>DSP</i>      | T                 | G           | 46.7% | 1.49 [1.41, 1.57] | 1.50×10 <sup>-48</sup>  | 100.0% |
| 7   | 1868761   | rs12537430  | <i>MAD1L1</i>   | A                 | G           | 62.5% | 1.28 [1.21, 1.35] | 4.20×10 <sup>-18</sup>  | 99.8%  |
| 7   | 99630342  | rs2897075   | <i>ZKSCAN1</i>  | C                 | T           | 38.2% | 1.30 [1.23, 1.37] | 1.77×10 <sup>-21</sup>  | 99.3%  |
| 8   | 120940206 | rs10808505  | <i>DEPTOR</i>   | G                 | T           | 57.3% | 1.20 [1.13, 1.26] | 6.03×10 <sup>-11</sup>  | 26.1%  |
| 10  | 111229861 | rs79684490  | 10q25.1         | G                 | A           | 4.6%  | 1.40 [1.24, 1.57] | 3.52×10 <sup>-8</sup>   | 94.0%  |
| 11  | 1241221   | rs35705950  | <i>MUC5B</i>    | G                 | T           | 14.5% | 5.06 [4.69, 5.47] | 9.09×10 <sup>-418</sup> | 100.0% |
| 13  | 113534984 | rs9577395   | <i>ATP11A</i>   | G                 | C           | 79.1% | 1.29 [1.21, 1.38] | 4.78×10 <sup>-14</sup>  | 93.6%  |
| 15  | 40716253  | rs2304645   | <i>IVD</i>      | G                 | C           | 52.6% | 1.28 [1.21, 1.35] | 8.66×10 <sup>-20</sup>  | 99.6%  |
| 15  | 40931708  | rs12912339  | <i>KNL1</i>     | G                 | A           | 15.9% | 1.30 [1.21, 1.39] | 7.41×10 <sup>-13</sup>  | 96.5%  |
| 15  | 86287910  | rs11073517  | <i>AKAP13</i>   | C                 | T           | 32.7% | 1.19 [1.13, 1.26] | 1.36×10 <sup>-9</sup>   | 11.4%  |
| 16  | 162240    | rs74614704  | <i>NPRL3</i>    | G                 | A           | 5.6%  | 1.49 [1.33, 1.67] | 2.57×10 <sup>-12</sup>  | 99.4%  |
| 17  | 44214888  | rs2077551   | 17q21.31        | C                 | T           | 80.7% | 1.42 [1.32, 1.53] | 1.92×10 <sup>-20</sup>  | 100.0% |
| 19  | 4717672   | rs12610495  | <i>DPP9</i>     | A                 | G           | 30.6% | 1.28 [1.21, 1.36] | 2.58×10 <sup>-16</sup>  | 96.3%  |
| 20  | 62284170  | rs112087793 | <i>STMN3</i>    | T                 | C           | 91.5% | 1.34 [1.21, 1.48] | 1.09×10 <sup>-8</sup>   | 96.8%  |
| 20  | 62324391  | rs41308092  | <i>RTEL1</i>    | G                 | A           | 2.1%  | 1.75 [1.45, 2.10] | 3.13×10 <sup>-9</sup>   | 99.9%  |
